# Supplementary material
Source: publisher figshare collection journal article supplement (https://sage.figshare.com/ndownloader/files/13569197)
Supplement: Supplementary file 1 [file 13569197]

**Supplemental Files:**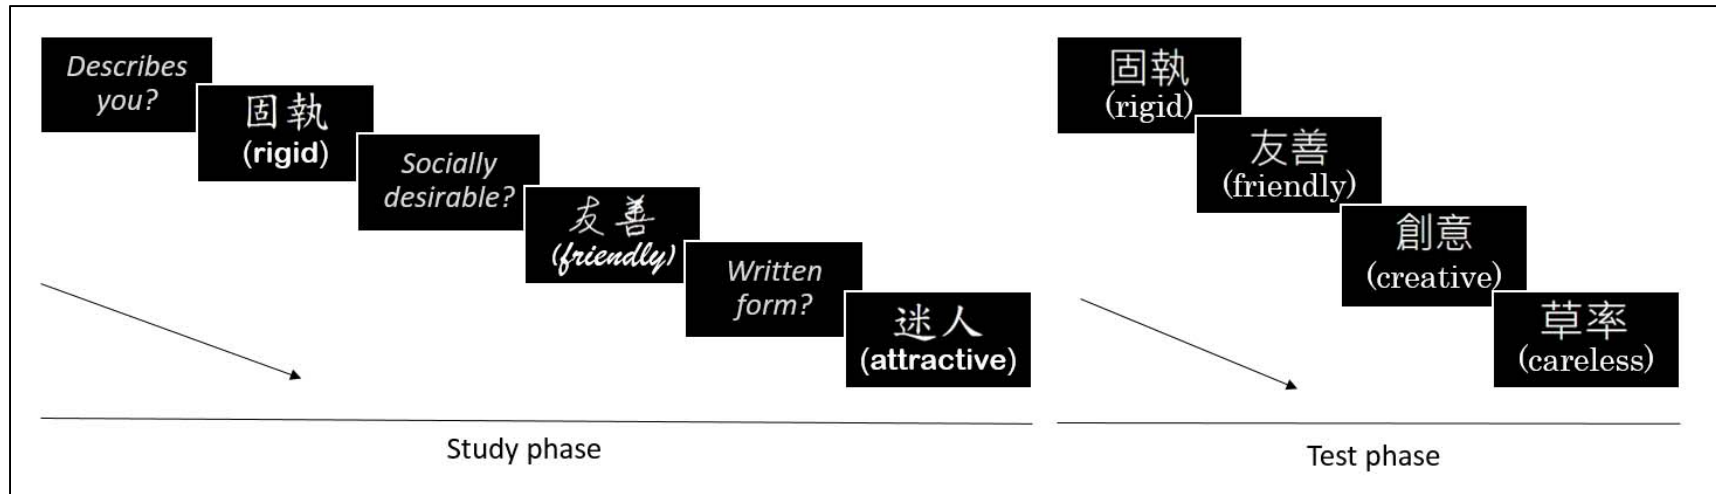

*Supplemental 1.* A schematic illustration of the procedure of the self-reference paradigm in Experiment 1. There were two phases. In the study phase, trait adjectives were judged in one of the three ways: self-reference (self-descriptive or not), social desirability (positive or negative), and written form (type- or hand-written). After a 20-minute distraction task, an incidental recognition test was introduced. Participants judged whether the word had appeared in the study phase or not.

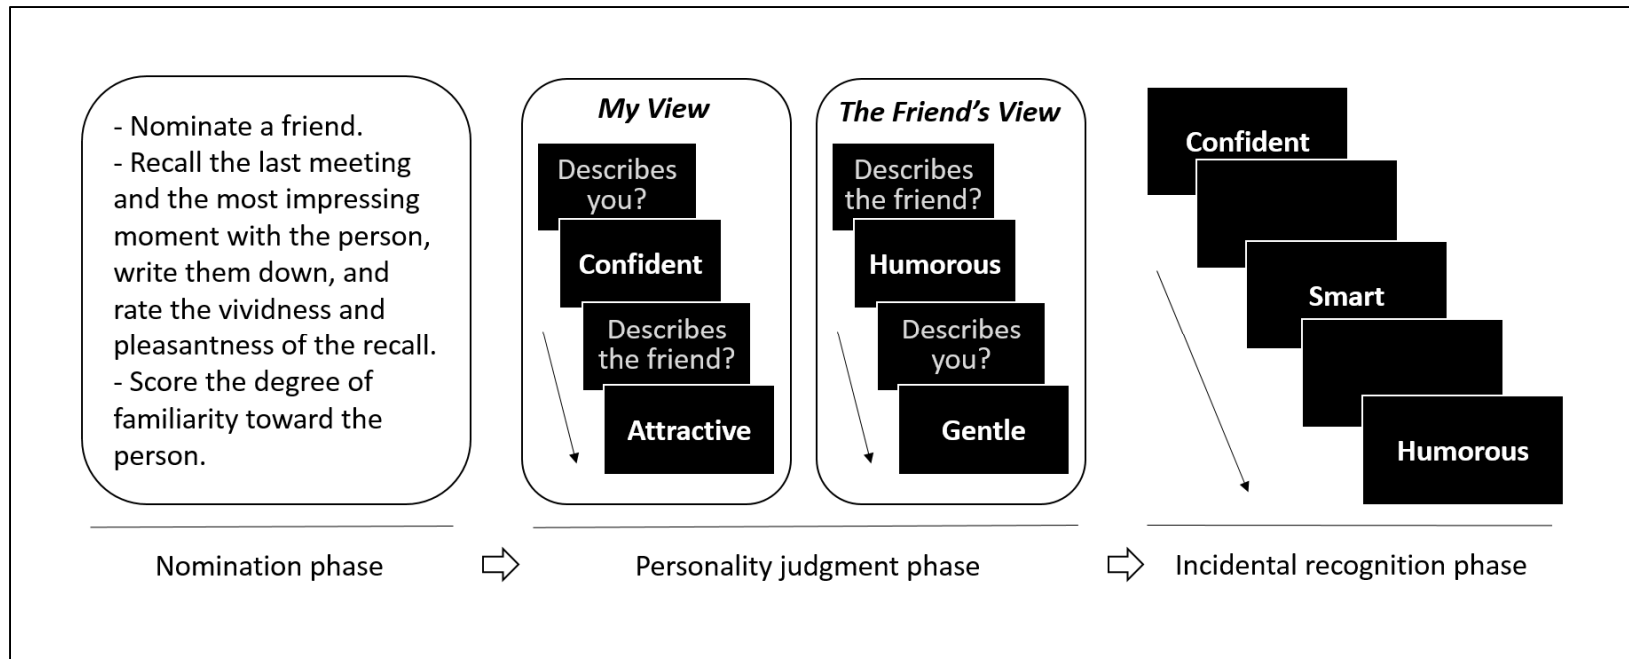

*Supplemental 2.* A schematic illustration of the procedure of the perspective-taking self-referential paradigm in Experiment 2. At the beginning of the task, a close friend was nominated and a warm-up recollection task was held. Then, the study phase started and participants judged whether a trait adjective could describe oneself or not (self-reference) or whether a trait adjective could describe the friend or not (other-reference). There were two blocks in the study phase. Participants were instructed to take the viewpoint of themselves for the personality judgment in the one block and the viewpoint of the friend in the other. After a 20-minute distraction task, a recognition test was held to test the accessibility of the studied items.

## Supplemental 3

*Means and Standard Deviations of the Measures for Psychopathology and Adverse Early Relational Experiences and the Measures for Memory Recognition in the Perspective-Switch Self-Referential Memory Task*

| Measures                  | <i>M</i> | <i>SD</i> | Measures                             | <i>M</i> | <i>SD</i> |
|---------------------------|----------|-----------|--------------------------------------|----------|-----------|
| Dissociation              |          |           | Adverse early relational experiences |          |           |
| DES                       | 22.68    | 18.86     | Parental indifference                | 15.87    | 5.25      |
| DPS                       | 83.27    | 20.49     | Parental over-control                | 15.06    | 4.74      |
| SDQ                       | 3.52     | 5.35      | Relational trauma                    | 0.51     | 0.97      |
| Negative affective states |          |           | Non-relational trauma                | 0.19     | 0.48      |
| Anxiety                   | 7.82     | 3.26      | Memory recognition                   |          |           |
| Depression                | 5.91     | 3.29      | New items                            | .86      | .10       |
| Psychoticism              |          |           | Self-Self                            | .85      | .12       |
| Hallucinatory experiences | 35.61    | 11.19     | Self-Friend                          | .77      | .14       |
| Delusional thoughts       | 6.34     | 2.76      | Friend-Self                          | .78      | .13       |
|                           |          |           | Friend-Friend                        | .72      | .15       |

*Note.* DES = Dissociative Experiences Scale, DPS = Dissociative Processes Scale, and SDQ = Somatoform Dissociation Questionnaire. For memory recognition, Self-Self and Self-Friend = self-reference and other-reference from the perspective of the self, respectively; Friend-Self and Friend-Friend = self-reference and other-reference from the perspective of the friend, respectively.

Supplemental 4

*Moderated Regression Analysis with Self-reference, Childhood Relational Trauma, and the Interaction to Predict the Raw Scores of the Dissociation Measures*

| Dependent variables                           |                                   | Regression coefficients |          |          |
|-----------------------------------------------|-----------------------------------|-------------------------|----------|----------|
|                                               | Independent variables             | <i>b</i> *              | <i>t</i> | <i>p</i> |
| The Dissociative Processes Scale              |                                   |                         |          |          |
|                                               | Self-reference (SR)               | -.19                    | -2.43    | .02      |
|                                               | Childhood relational trauma (CRT) | .11                     | 1.33     | .18      |
|                                               | SR*CRT                            | -.31                    | -3.06    | <.01     |
| Model: $F(3, 152) = 6.52, p < .01, R^2 = .11$ |                                   |                         |          |          |
| The Dissociative Experiences Scale            |                                   |                         |          |          |
|                                               | Self-reference (SR)               | -.19                    | -2.36    | .02      |
|                                               | Childhood relational trauma (CRT) | .08                     | 0.99     | .32      |
|                                               | SR*CRT                            | -.24                    | -2.24    | .03      |
| Model: $F(3, 152) = 4.23, p < .01, R^2 = .08$ |                                   |                         |          |          |
| The Somatoform Dissociation Questionnaire     |                                   |                         |          |          |
|                                               | Self-reference (SR)               | .08                     | 1.05     | .30      |
|                                               | Childhood relational trauma (CRT) | .10                     | 1.29     | .20      |
|                                               | SR*CRT                            | -.15                    | -1.55    | .12      |
| Model: $F(3, 152) = 2.52, p = .06, R^2 = .05$ |                                   |                         |          |          |

**Supplemental 5**

*Moderated Regression Analysis with Self-reference, Childhood Relational Trauma, and the Interaction to Predict the Measures for Anxiety, Depression, Hallucinatory Experiences, and Delusional Thoughts*

| Dependent variables                                                  |                                               | Regression coefficients |          |          |  |
|----------------------------------------------------------------------|-----------------------------------------------|-------------------------|----------|----------|--|
|                                                                      | Independent variables                         | <i>b</i> *              | <i>t</i> | <i>p</i> |  |
| The anxiety subscale of the Hospital Anxiety and Depression Scale    |                                               |                         |          |          |  |
|                                                                      | Self-reference (SR)                           | -.06                    | -0.69    | .49      |  |
|                                                                      | Childhood relational trauma (CRT)             | .12                     | 1.38     | .17      |  |
|                                                                      | SR*CRT                                        | .02                     | 0.16     | .88      |  |
|                                                                      | Model: $F(3, 152) = 0.95, p = .42, R^2 = .02$ |                         |          |          |  |
| The depression subscale of the Hospital Anxiety and Depression Scale |                                               |                         |          |          |  |
|                                                                      | Self-reference (SR)                           | -.11                    | -1.38    | .17      |  |
|                                                                      | Childhood relational trauma (CRT)             | .05                     | 0.54     | .59      |  |
|                                                                      | SR*CRT                                        | .02                     | 0.16     | .87      |  |
|                                                                      | Model: $F(3, 152) = 0.88, p = .45, R^2 = .02$ |                         |          |          |  |
| The Launay-Slade Hallucination Scale                                 |                                               |                         |          |          |  |
|                                                                      | Self-reference (SR)                           | -.20                    | -2.49    | .01      |  |
|                                                                      | Childhood relational trauma (CRT)             | .07                     | 0.88     | .38      |  |
|                                                                      | SR*CRT                                        | -.07                    | -0.70    | .49      |  |
|                                                                      | Model: $F(3, 152) = 2.78, p = .04, R^2 = .05$ |                         |          |          |  |
| The Peters et al. Delusion Inventory                                 |                                               |                         |          |          |  |
|                                                                      | Self-reference (SR)                           | -.17                    | -2.06    | .04      |  |
|                                                                      | Childhood relational trauma (CRT)             | .18                     | 2.10     | .04      |  |
|                                                                      | SR*CRT                                        | .05                     | 0.44     | .66      |  |
|                                                                      | Model: $F(3, 152) = 3.57, p = .02, R^2 = .07$ |                         |          |          |  |
